# Supplementary material for: Idebenone Protects against Acute Murine Colitis via Antioxidant and Anti-Inflammatory Mechanisms
Source: PubMed Central journal article supplement (PMC7013829; doi:10.3390/ijms21020484), 2020-01-12
Supplement: ijms-21-00484-s001.pdf [file ijms-21-00484-s001.pdf]

A

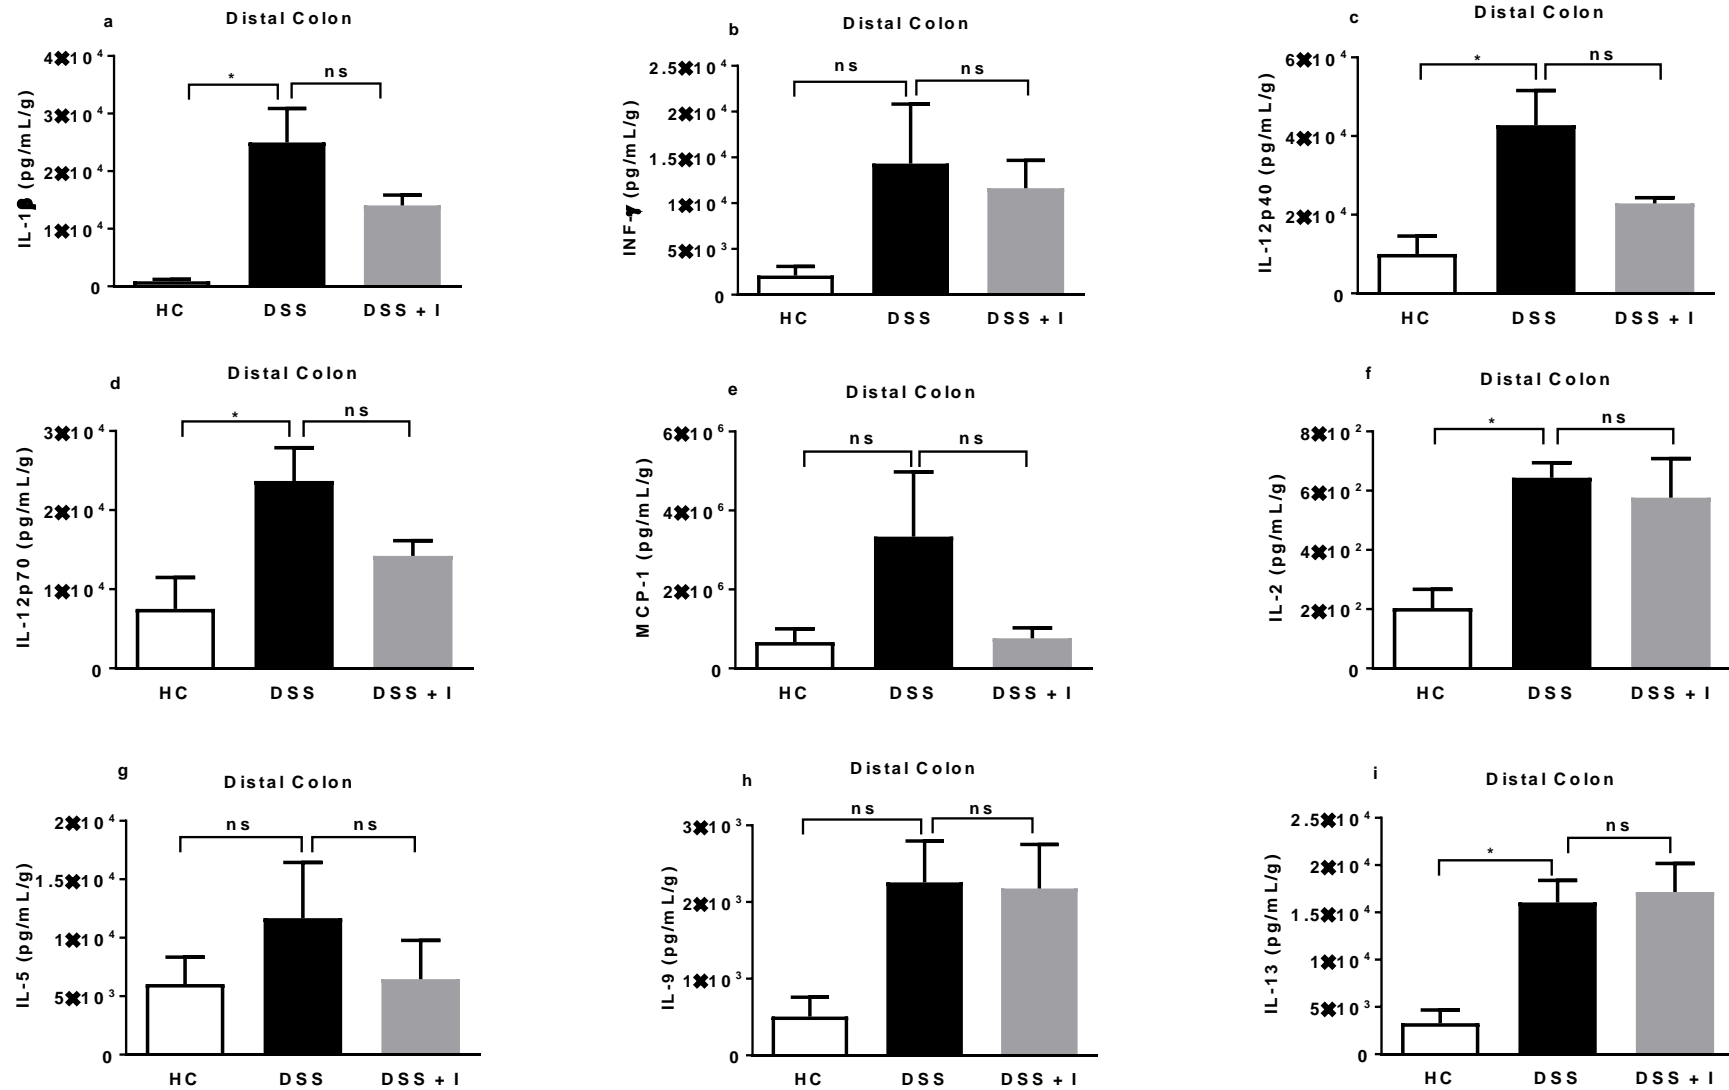

**B**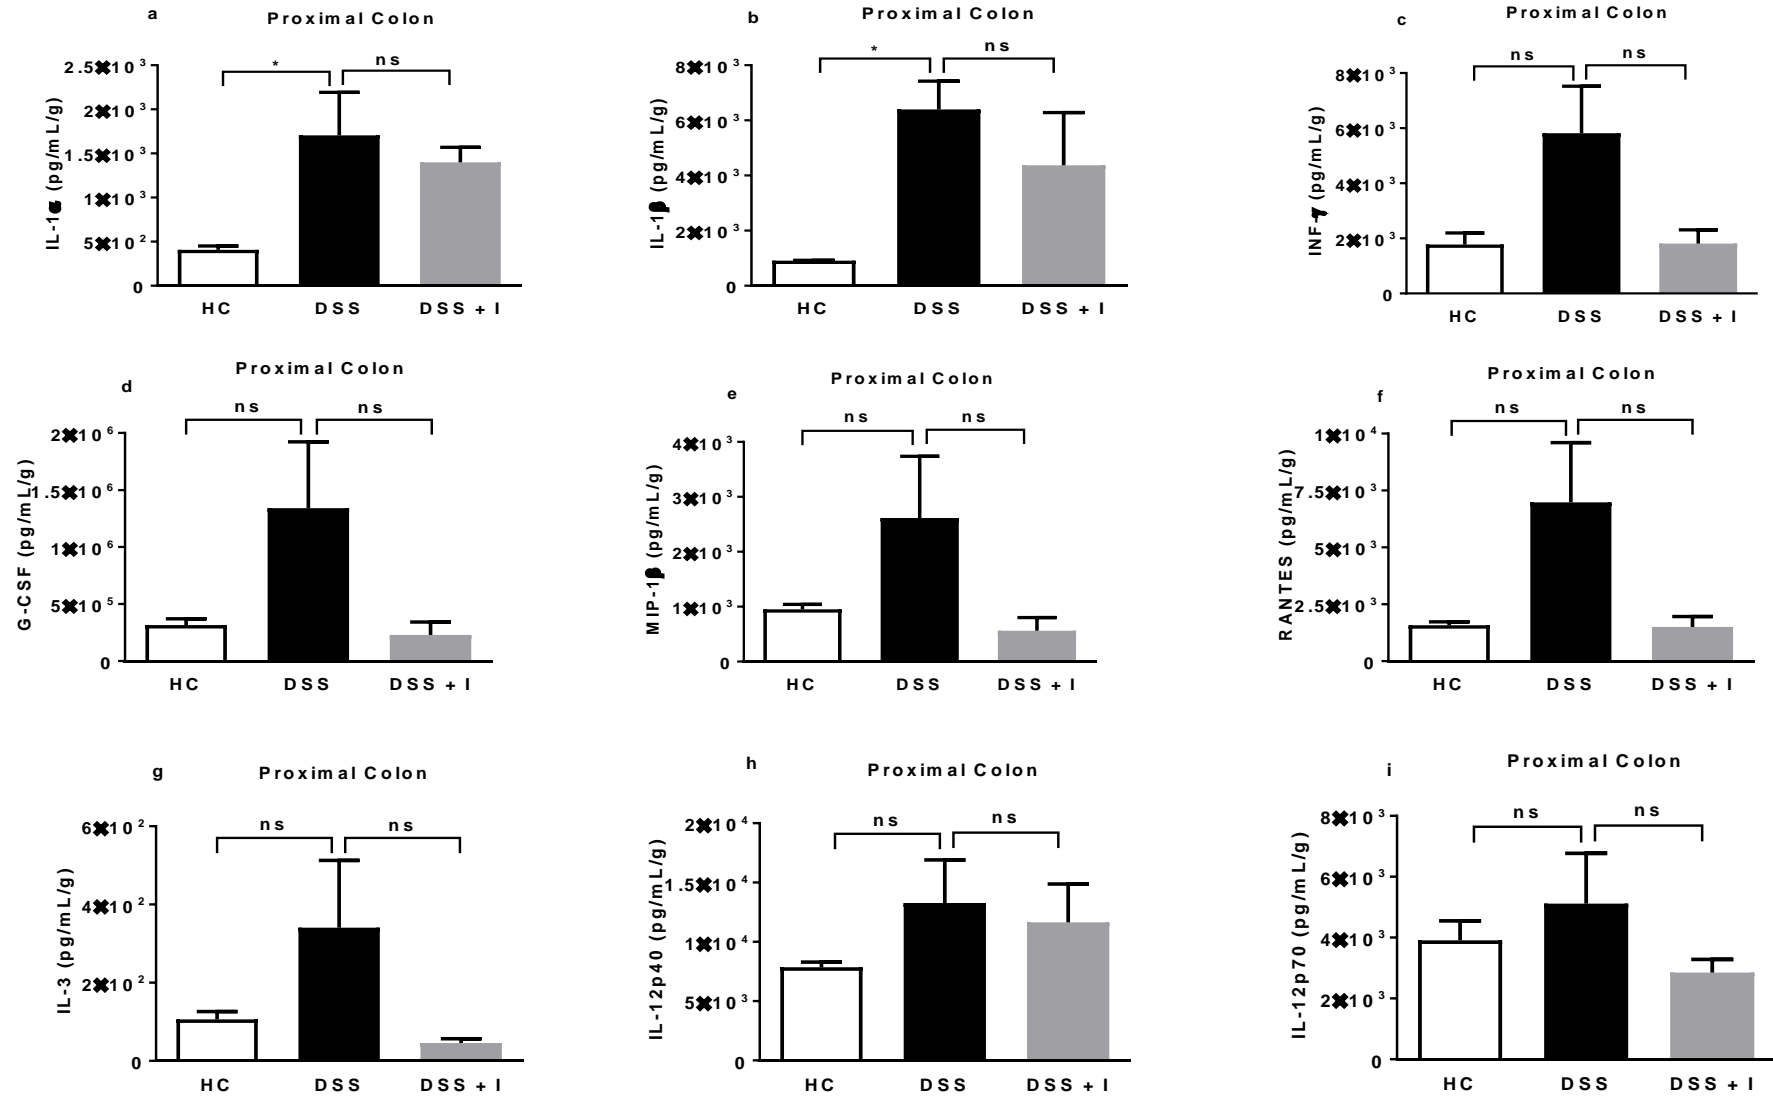

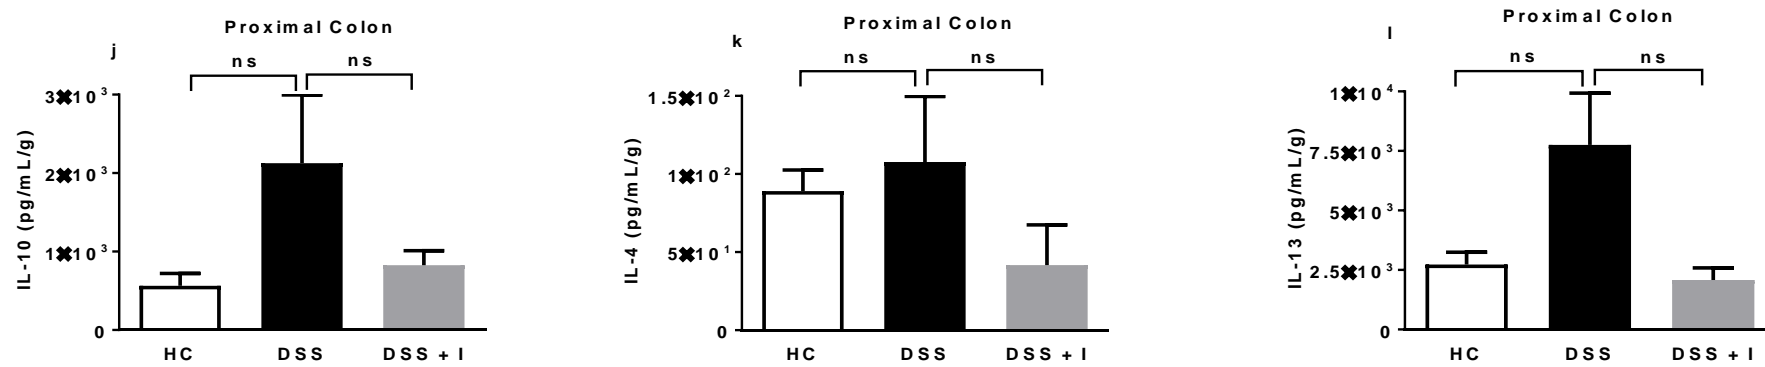

**Supplementary Figure S1.** Effect of idebenone on the level of pro-inflammatory cytokines and chemokines in colon tissue. **A)** Tissue levels of IL-1 $\beta$ , INF- $\gamma$ , IL-12p40, IL-12p70, MCP-1, IL-2, IL-5, IL-9 and IL-13 in distal colon and **B)** the levels of IL-1 $\alpha$ , IL-1 $\beta$ , INF- $\gamma$ , G-CSF, MIP-1 $\beta$ , RANTES, IL-3, IL-12p40, IL-12p70, IL-10, IL-4 and IL-13 in proximal colon were quantified by Bio-Plex assay. Data expressed as mean  $\pm$  SEM (n=3/group) and statistical significance evaluated by One-way ANOVA followed by Tukey's post-test where  $*p < 0.05$ .
